# Supplementary material for: Role of dietary factors in the prevention and treatment for depression: an umbrella review of meta-analyses of prospective studies
Source: PubMed Central journal article supplement (PMC8445939; doi:10.1038/s41398-021-01590-6), 2021-09-16
Supplement: 41398_2021_1590_MOESM1_ESM.pdf [file 41398_2021_1590_MOESM1_ESM.pdf]

**Supplementary table 1.** Search terms and search strategies from PubMed, Embase, and Cochrane Library

| <b>PubMed</b> |                                                                                                                                                                                                                                                                                                                                                                                                                                                                                                                                                                                                                                                                                                                                                                                                                                                                                                                |
|---------------|----------------------------------------------------------------------------------------------------------------------------------------------------------------------------------------------------------------------------------------------------------------------------------------------------------------------------------------------------------------------------------------------------------------------------------------------------------------------------------------------------------------------------------------------------------------------------------------------------------------------------------------------------------------------------------------------------------------------------------------------------------------------------------------------------------------------------------------------------------------------------------------------------------------|
| #1            | <p>((((((((((((Depression*[Title/Abstract] OR (Depressive Symptom*[Title/Abstract])) OR (Emotional Depression*[Title/Abstract])) OR (Depressive Disorder*[Title/Abstract])) OR (Depressive Syndrome*[Title/Abstract])) OR (Melancholia*[Title/Abstract])) OR (Unipolar Depression*[Title/Abstract])) OR (Postnatal Depression*[Title/Abstract])) OR (Post-Partum Depression*[Title/Abstract])) OR (Major Depressive Disorder*[Title/Abstract])) OR (Post-Partum Depression*[Title/Abstract])) OR (Post-Natal Depression*[Title/Abstract])) OR ("Depression"[Mesh] OR "Depressive Disorder"[Mesh] OR "Depression, Postpartum"[Mesh]) OR "Depressive Disorder, Major"[Mesh])</p>                                                                                                                                                                                                                                 |
| #2            | <p>((((((("Diet"[Mesh]) OR "Food"[Mesh]) OR "Beverages"[Mesh]) OR "Fermented Foods and Beverages"[Mesh]) OR "Dietary Supplements"[Mesh]) OR "Micronutrients"[Mesh]) OR "Minerals"[Mesh]) OR "Polyphenols"[Mesh]) OR (((((((((((((((((((diet*[Title/Abstract] OR (dietary[Title/Abstract])) OR (nutrition[Title/Abstract])) OR (food*[Title/Abstract])) OR (nutrient*[Title/Abstract])) OR (drink*[Title/Abstract])) OR (beverage*[Title/Abstract])) OR (supplement*[Title/Abstract])) OR (supplementation[Title/Abstract])) OR (intake[Title/Abstract])) OR (eating[Title/Abstract])) OR (drinking[Title/Abstract])) OR (consumption[Title/Abstract])) OR (macronutrient*[Title/Abstract])) OR (micronutrient*[Title/Abstract])) OR (trace element*[Title/Abstract])) OR (phytochemical*[Title/Abstract])) OR (polyphenol*[Title/Abstract])) OR (vitamin*[Title/Abstract])) OR (mineral*[Title/Abstract]))</p> |
| #3            | <p>(((((systematic review*[Title/Abstract] OR (comprehensive review*[Title/Abstract])) OR (systematic overview*[Title/Abstract])) OR</p>                                                                                                                                                                                                                                                                                                                                                                                                                                                                                                                                                                                                                                                                                                                                                                       |

|                         |                                                                                                                                                                                                                                                                                                          |
|-------------------------|----------------------------------------------------------------------------------------------------------------------------------------------------------------------------------------------------------------------------------------------------------------------------------------------------------|
|                         | (comprehensive overview*[Title/Abstract])) OR (meta-analys*[Title/Abstract]))<br>OR (metaanalys*[Title/Abstract])) OR (("Review Literature as Topic"[Mesh]) OR<br>"Meta-Analysis as Topic"[Mesh])                                                                                                        |
| #4                      | #1 AND #2 AND #3                                                                                                                                                                                                                                                                                         |
| <b>Embase</b>           |                                                                                                                                                                                                                                                                                                          |
| #1                      | postnatal depression/ or depression/ or major depression/ or postoperative<br>depression / or perinatal depression/                                                                                                                                                                                      |
| #2                      | (depression* or depressive symptom* or emotional depression* or depressive<br>disorder* or depressive syndrome* or melancholia* or unipolar depression* or<br>postnatal depression* or post-partum depression* or major depressive disorder* or<br>postpartum depression* or post-natal depression*).mp. |
| #3                      | #1 or #2                                                                                                                                                                                                                                                                                                 |
| #4                      | Food/ or diet/ or beverage/ or fermented product/ or dietary supplement/ or trace<br>element/ or mineral/ or polyphenol/                                                                                                                                                                                 |
| #5                      | (diet* or dietary or nutrition or food* or drink* or beverage* or supplement* or<br>supplementation or intake or eating or drinking or consumption or macronutrient*<br>or micronutrient* or macronutrient* or trace element* or photochemical* or<br>polyphenol* or mineral* or vitamin*).mp.           |
| #6                      | #4 or #5                                                                                                                                                                                                                                                                                                 |
| #7                      | “systematic review”/ or meta analysis/                                                                                                                                                                                                                                                                   |
| #8                      | (“systematic review*” or “comprehensive review*” or “systematic overview*” or<br>“comprehensive overview*” or meta-analys* or metaanalys*).mp.                                                                                                                                                           |
| #9                      | #7 or #8                                                                                                                                                                                                                                                                                                 |
| #10                     | #3 AND #6 AND #9                                                                                                                                                                                                                                                                                         |
| <b>Cochrane Library</b> |                                                                                                                                                                                                                                                                                                          |
| #1                      | ([Diet] explode all trees) OR ([Food] explode all trees) OR ([Beverages] explode all<br>trees) OR ([Fermented Foods and Beverages] explode all trees) OR ([Dietary<br>Supplements] explode all trees) OR ([Micronutrients] explode all trees) OR                                                         |

|     |                                                                                                                                                                                                                                                                                                                                                                                                                                                                                                                          |
|-----|--------------------------------------------------------------------------------------------------------------------------------------------------------------------------------------------------------------------------------------------------------------------------------------------------------------------------------------------------------------------------------------------------------------------------------------------------------------------------------------------------------------------------|
|     | ([Minerals] explode all trees) OR ([Polyphenols] explode all trees)                                                                                                                                                                                                                                                                                                                                                                                                                                                      |
| #2  | (diet*):ti,ab,kw OR (dietary):ti,ab,kw OR (nutrition):ti,ab,kw OR (food*):ti,ab,kw<br>OR (nutrient*):ti,ab,kw OR (drink*):ti,ab,kw OR (beverage*):ti,ab,kw OR<br>(supplement*):ti,ab,kw OR (supplementation):ti,ab,kw OR (intake):ti,ab,kw OR<br>(eating):ti,ab,kw OR (drinking):ti,ab,kw OR (consumption):ti,ab,kw OR<br>(macronutrient*):ti,ab,kw OR (micronutrient*):ti,ab,kw OR (trace<br>element*):ti,ab,kw OR (phytochemical*):ti,ab,kw OR (polyphenol*):ti,ab,kw OR<br>(vitamin*):ti,ab,kw OR (mineral*):ti,ab,kw |
| #3  | #1 OR #2                                                                                                                                                                                                                                                                                                                                                                                                                                                                                                                 |
| #4  | ([Depression] explode all trees) OR ([Depressive Disorder] explode all trees) OR<br>([Depression, Postpartum] explode all trees) OR ([Depressive Disorder, Major]<br>explode all trees)                                                                                                                                                                                                                                                                                                                                  |
| #5  | (depression*):ti,ab,kw OR (depressive symptom*):ti,ab,kw OR (depressive<br>disorder*):ti,ab,kw OR (depressive syndrome*):ti,ab,kw OR<br>(melancholia*):ti,ab,kw OR (unipolar depression*):ti,ab,kw OR (postnatal<br>depression*):ti,ab,kw OR (post-partum depression*):ti,ab,kw OR (major depressive<br>disorder*):ti,ab,kw OR (post partum depression*):ti,ab,kw                                                                                                                                                        |
| #6  | #4 OR #5                                                                                                                                                                                                                                                                                                                                                                                                                                                                                                                 |
| #7  | ([Systematic Reviews as Topic] explode all trees) OR ([Meta-Analysis as Topic]<br>explode all trees)                                                                                                                                                                                                                                                                                                                                                                                                                     |
| #8  | (systematic review*):ti,ab,kw OR (systematic review*):ti,ab,kw OR (systematic<br>overview*):ti,ab,kw OR (comprehensive overview*):ti,ab,kw OR (meta-<br>analys*):ti,ab,kw                                                                                                                                                                                                                                                                                                                                                |
| #9  | #7 OR #8                                                                                                                                                                                                                                                                                                                                                                                                                                                                                                                 |
| #10 | #3 AND #6 AND #9 in Cochrane Reviews, Cochrane Protocols                                                                                                                                                                                                                                                                                                                                                                                                                                                                 |
