# Supplementary material for: Role of dietary factors in the prevention and treatment for depression: an umbrella review of meta-analyses of prospective studies
Source: PubMed Central journal article supplement (PMC8445939; doi:10.1038/s41398-021-01590-6), 2021-09-16
Supplement: 41398_2021_1590_MOESM2_ESM.pdf [file 41398_2021_1590_MOESM2_ESM.pdf]

**Supplementary Table 2. Detail characteristics of included meta-analyses in this umbrella review.**

| PMID                     | Author (year)    | Dietary intervention/exposures                  | Comparison                                       | Database searched                                                                                                     | Search period           | No of studies | Type of included studies | Settings                            | Participants             | Ages    | %Male | Total N                            | Follow years | Funding     | Country of author | Recalculated ES with 95%CI | I <sup>2</sup> | ASMAT-2  |
|--------------------------|------------------|-------------------------------------------------|--------------------------------------------------|-----------------------------------------------------------------------------------------------------------------------|-------------------------|---------------|--------------------------|-------------------------------------|--------------------------|---------|-------|------------------------------------|--------------|-------------|-------------------|----------------------------|----------------|----------|
| <a href="#">32792031</a> | Pagliai, 2021    | ultra-processed foods                           | highest vs lowest intake                         | 5(MEDLINE, Embase, Scopus, Web of Science and Google Scholar databases,)                                              | to June 2020            | 2             | Cohort                   | 2EU                                 | general adults           | 18-86   | NR    | 41637                              | NR           | None        | Italy             | 1.19(1.01,1.37)            | 34.4%          | high     |
| <a href="#">33533015</a> | Tome, 2021       | vitamin D supplementation                       | vitamin D vs placebo                             | 4(PubMed, Embase, Web of Science-Science Citation Index)                                                              | to September 21 2019    | 10            | RCTs                     | 6 Asia, 3 EU, 1 USA                 | depressed adult patients | NR      | NR    | 1398 (I:696; C:702)                | NR           | NR          | Spain             | -0.91(-2.02,0.19)          | 99.0%          | low      |
| <a href="#">33809274</a> | Markun, 2021     | B vitamin supplementation                       | B vitamin vs placebo                             | 5(MEDLINE® (via Ovid), Embase®, PsycINFO, Cochrane Library, and Scopus)                                               | in June 2020            | 5             | RCTs                     | 2 Australia; 2 EU; 1USA             | depressed adult patients | >65     | 0-50  | 5158                               | NR           | None        | Switzerland       | -0.03(-0.12, 0.06)         | 15.1%          | high     |
| <a href="#">34026809</a> | Chen, 2021       | DII                                             | highest adherence vs lowest adherence            | 3(PubMed, Embase, and Web of Science)                                                                                 | to December 31, 2020    | 4             | Cohort                   | 2EU; 1Australia; 1USA               | general adults           | 18-69   | 0-42  | 28662(4083cases)                   | 8.5-12.6     | Institution | China             | 1.28(1.17,1.39)            | 39.5%          | low      |
| <a href="#">33970709</a> | Fusar-Poli, 2021 | cocoa-rich foods                                | cocoa-rich products vs placebo                   | 5(Web of Science, MEDLINE, KCI – Korean Journal Database, Russian Science Citation Index, and SciELO Citation Index), | to April 3, 2020        | 5             | RCTs                     | 2 Asia; 1 EU; 1 USA; 1 Australia    | depressed adult patients | 50-80   | 0-100 | 293 (I:148; C:145)                 | NR           | None        | Italy             | -0.422(-0.675,-0.169)      | 43.5%          | high     |
| <a href="#">31837230</a> | Li, 2020         | alcohol intake                                  | heavy drinking (>48g/d) vs non-drinkers          | 3(PubMed, Embase, PsycINFO)                                                                                           | to 15 April 2019        | 24            | Cohort                   | 12 EU; 6 USA; 5 Australia; 1 Canada | general adults           | 18-99   | 0-100 | 295477 (21378 cases)               | 1-40         | Government  | China             | 1.01(0.89,1.15)            | 40.5%          | low      |
| <a href="#">29076953</a> | Veronesi, 2018   | Acetyl-L-Carnitine supplementation intervention | ALC vs placebo                                   | 5(PubMed, EMBASE, SCOPUS, Cochrane Central Register of Controlled Trials, and Clinicaltrials.gov)                     | until December 30, 2016 | 9             | RCTs                     | 7 Italy; 1Russian; 1 Norway         | depressed adult patients | 46.3-80 | 20-60 | 467(intervention 231; control 236) |              | None        | United Kingdom    | -1.1(-1.65,-0.65)          | 86.0%          | low      |
| <a href="#">30254236</a> | Lassale, 2019    | AHEI or AHEI-2010                               | highest adherence vs lowest adherence            | 3(Medline, Embase and PsycINFO)                                                                                       | to 31st May 2018        | 3             | Cohort                   | EU                                  | general adults           | 37-61   | NR    | 45533(3477 cases)                  | 5-8.5        | Fundation   | United Kingdom    | 0.74(0.48,0.99)            | 80.7%          | moderate |
| <a href="#">31837230</a> | Li, 2020         | alcohol intake                                  | light-moderate drinking (<40g/d) vs non-drinkers | 3(PubMed, Embase, PsycINFO)                                                                                           | to 15 April 2019        | 11            | Cohort                   | NR                                  | general adults           | 18-99   | 0-100 | 3423 cases                         | 1-40         | Government  | China             | 0.81(0.75,0.87)            | 43.6%          | low      |
| <a href="#">26339067</a> | Wang, 2016       | caffeine exposure                               | highest intake vs lowest intake                  | 3(PubMed database, Web of Science China National Knowledge Infrastructure (CNKI) and WANFANG DATA"                    | up to 1 May 2015        | 4             | Cohort                   | 3 EU; 1 USA                         | general adults           | >18     | NR    | 29033                              | NR           | Fundation   | China             | 0.83(0.75,0.92)            | 0.0%           | very low |
| <a href="#">26339067</a> | Wang, 2016       | caffeine exposure                               | 509mg/day                                        | 3(PubMed database, Web of Science China National Knowledge Infrastructure (CNKI) and WANFANG DATA"                    | up to 1 May 2015        | 1             | Cohort                   | 3 EU; 1 USA                         | general adults           | >18     | NR    | 5992(669 cases)                    | NR           | Fundation   | China             | 0.25(0.18,0.35)            | not applicable | very low |

|                          |                |                                                  |                                             |                                                                                                                                                                                                                       |                         |    |        |                                            |                              |         |        |                                          |                |             |               |                     |       |          |
|--------------------------|----------------|--------------------------------------------------|---------------------------------------------|-----------------------------------------------------------------------------------------------------------------------------------------------------------------------------------------------------------------------|-------------------------|----|--------|--------------------------------------------|------------------------------|---------|--------|------------------------------------------|----------------|-------------|---------------|---------------------|-------|----------|
| <a href="#">29076953</a> | Verones e,2018 | Acetyl-L-Carnitine supplementati on intervention | ALC vs antidepressant                       | 5(PubMed, EMBASE, SCOPUS, Cochrane Central Register of Controlled Trials, and Clinicaltrials.gov)                                                                                                                     | until December 30, 2016 | 3  | RCTs   | 3 Italy                                    | depressed adult patients     | 45-72.2 | 22-33  | 324(interven tion 162; control 162)      |                | None        | United Kindom | 0.06(-0.22,-0.34)   | 31.0% | low      |
| <a href="#">29804517</a> | Wu,2020        | AHEI-2010 scores or AHEI scores                  | highest adherence vs lowest adherence       | 9(Google Scholar, PubMed, Scopus, Web of Science, Elsevier Word mark, Cochrane library, Clinical Trial, Airiti Library, and the National Digital Library of Theses and Dissertations in Taiwan)                       | up to December 2016     | 2  | cohort | EU                                         | general adults               | NR      | NR     | 19308(1311 cases)                        | 10-15          | None        | China         | 0.57(0.47,0.67)     | 0.0%  | low      |
| <a href="#">31527485</a> | Young, 2019    | B vitamin supplementati on                       | B vitamin vs placebo                        | 4(PubMed andWeb of Science, Scopus, and PsycINFO)                                                                                                                                                                     | until January 2019      | 7  | RCTs   | NR                                         | healthy and “at risk” adults | 18-69   | 0-100  | 568 ( intervention 278 control 290)      |                | Institution | Australia     | 0.15(-0.01,0.32)    | 0.0%  | very low |
| <a href="#">29031185</a> | Molendijk,2018 | healthy dietary pattern                          | highest adherence vs lowest adherence       | 3(Embase,PUBMED, and Web of Science)                                                                                                                                                                                  | up to March 6th, 2017   | 9  | Cohort | 3 EU; 2 Australia; 1 USA; 2 Canada;1 Asian | general adults               | 18-74   | 0-75   | 105494                                   | 6.5 month-12.7 | NR          | Netherlands   | 0.77 (0.67,0.89)    | 87.7% | moderate |
| <a href="#">24196402</a> | Lai,2014       | healthy dietary pattern                          | highest adherence vs lowest adherence       | 5(Medline, Embase, and PsycInfo via Ovid,EBSCO,Proquest)                                                                                                                                                              | up to August 2013       | 4  | Cohort | 2 EU;2 USA                                 | general adult population     | 18-85   | 0-57.6 | 68416                                    | 4.4-15         | None        | Australia     | 0.77(0.57,0.98)     | 94.0% | low      |
| <a href="#">30720698</a> | Firth,2019     | dietary intervention                             | dietary intervention vs non dietary control | 6(OVIDMedline,Cochrane Central Register of Controlled Trials, Health Technology Assessment Database, Allied and Complementary Medicine (AMED), Embase, Health Management Information Consortium (HMIC), and PsycINFO) | December 03, 2018       | 16 | RCTs   | NR                                         | depressed adult patients     | 21-85   | NR     | 45958(intervention 19180; control 26778) |                | institution | United Kindom | 0.275(0.1,0.45)     | 89.4% | high     |
| <a href="#">32829928</a> | Yosae, 2020    | dietary zinc supplementati on                    | zinc vs placebo/antidepressants             | 4 (PubMed,EMBASE, Scopus, and ISI web of science)                                                                                                                                                                     | up to 14 May2020        | 7  | RCTs   | 5 Iran; 2 Poland                           | depressed adult patients     | NR      | NR     | 319 (intervention 159; control 160)      |                | NR          | Iran          | -4.15(-6.56,-1.75)  | 80.1% | high     |
| <a href="#">32885249</a> | da Silva,2020  | dietary zinc supplementati on                    | zinc vs placebo/antidepressants             | 5("MEDLINE/PubMed, LILACS, CENTRAL, Web of Science, and Embase databases)                                                                                                                                             | until September 2019    | 5  | RCTs   | 3 Poland 2 Iran                            | depressed adult patients     | 18-80   | NR     | 192( intervention 96 ; control 96)       |                | None        | Brazil        | -0.36(-0.67,-0.04)  | 70.6% | low      |
| <a href="#">27113121</a> | Sarris,2016    | folic acid supplementati on                      | folic acid vs placebo                       | 4(PubMed, CINAHL, Web of Science, and Cochrane Library)                                                                                                                                                               | up to December 2015     | 4  | RCTs   | NR                                         | depressed adult patients     | >18     | NR     | 671                                      |                | NR          | Australia     | 0.487(-0.314,1.288) | 93.0% | very low |

|                          |                 |                                                      |                                       |                                                                                                                                                                                                       |                      |    |        |                                            |                          |       |        |                                        |        |             |                |                     |                |          |
|--------------------------|-----------------|------------------------------------------------------|---------------------------------------|-------------------------------------------------------------------------------------------------------------------------------------------------------------------------------------------------------|----------------------|----|--------|--------------------------------------------|--------------------------|-------|--------|----------------------------------------|--------|-------------|----------------|---------------------|----------------|----------|
| <a href="#">28431261</a> | Li Y, 2017      | healthy dietary pattern exposure                     | highest adherence vs lowest adherence | 2(MEDLINE and EMBASE databases)                                                                                                                                                                       | up to September 2016 | 12 | Cohort | 5 EU; 3 Asia; 2 Australia; 1 Canada; 1 USA | general adults           | 20-77 | NR     | 103076                                 | NR     | Government  | China          | 0.68(0.59,0.77)     | 79.0%          | low      |
| <a href="#">30319085</a> | Wang, 2018      | inflammatory potential of the diet                   | highest adherence vs lowest adherence | 3(PubMed, Web of Science and EMBASE databases)                                                                                                                                                        | to August 2018       | 4  | Cohort | 2 EU; 1 USA; 1 Australia                   | general adults           | 26-70 | 0-57.7 | 28662(3216 cases)                      | 8-12.6 | Government  | China          | 1.25(1.12,1.40)     | 0.0%           | low      |
| <a href="#">30254236</a> | Lassale, 2019   | Inflammatory potential of the diet (DII)             | lowest adherence vs highest adherence | 3(Medline, Embase and PsychINFO)                                                                                                                                                                      | to 31st May 2018     | 5  | Cohort | 3 EU; 1 USA; 1 Australia                   | general adults           | 37-61 | NR     | 32908(3481 cases)                      | 5-12.6 | Foundation  | United Kingdom | 0.70(0.59,0.82)     | 55.3%          | moderate |
| <a href="#">26518745</a> | Grosso, 2016(2) | caffeine exposure                                    | highest intake vs lowest intake       | 2(PubMed Embase)                                                                                                                                                                                      | up to June 2015      | 3  | Cohort | 2 EU; 1 USA                                | general adults           | NR    | NR     | 58756(2656 cases)                      |        | NR          | Italy          | 0.84(0.75,0.92)     | 0.0%           | low      |
| <a href="#">26518745</a> | Grosso, 2016(2) | caffeine exposure                                    | 100ml/d increment                     | 2(PubMed Embase)                                                                                                                                                                                      | up to June 2015      | 3  | Cohort | 2 EU; 1 USA                                | general adults           | NR    | NR     | 58756(2656 cases)                      |        | NR          | Italy          | 0.97(0.95,0.99)     | 0.0%           | low      |
| <a href="#">31383846</a> | Liao, 2019      | n-3 fatty acid intervention                          | n-3 fatty acid vs placebo             | 2("PubMed, the Ovid version of EMBASE)                                                                                                                                                                | to 20 December 2017  | 26 | RCTs   | NR                                         | depressed adult patients | NR    | 18-95  | 2160 (intervention 1089, placebo 1071) |        | Government  | China          | -0.28(-0.47,-0.09)  | 75.0%          | low      |
| <a href="#">30138808</a> | Bai, 2018       | n-3 fatty acid intervention                          | n-3 vs placebo                        | 9("MEDLINE, EMBASE, Web of Science, Cochrane Library, PsycINFO, Global Health, CINAHL, China National Knowledge Infrastructure (CNKI), ClinicalTrials.gov, and Chinese Biomedical Medicine Database") | to June 4, 2018      | 9  | RCTs   | 6 EU; 2 Asian; 1 Australia                 | depressed adult patients | 70-90 | NR     | 3549(intervention 1821; control 1728)  |        | institution | China          | -0.202(-0.463,0.06) | NR             | very low |
| <a href="#">30502975</a> | Tolkien, 2019   | inflammatory potential of the diet (DII or cytokine) | highest adherence vs lowest adherence | 2(PubMed and Scopus)                                                                                                                                                                                  | to 3rd October 2018  | 7  | Cohort | 4 EU; 2 USA; 1 Australia                   | general adults           | 26-81 | 0-75   | 77420                                  | 5-12.6 | None        | United Kingdom | 1.23(1.08,1.39)     | 40.8%          | low      |
| <a href="#">29500461</a> | Kang, 2018      | coffee exposure                                      | highest intake vs lowest intake       | 2(PubMed and Web of Science)                                                                                                                                                                          | to February 2017     | 3  | cohort | 2 USA; 1 EU                                | general adults           | 50-71 | 0-100  | 305583(13967 cases)                    | NR     | Government  | South Korea    | 0.76(0.55,0.98)     | 58.8%          | very low |
| <a href="#">26339067</a> | Wang, 2016      | coffee exposure                                      | highest intake vs lowest intake       | 3(PubMed database, Web of Science China National Knowledge Infrastructure (CNKI) and WANFANG DATA"                                                                                                    | up to 1 May 2015     | 2  | Cohort | 1 EU; 1 USA                                | general adults           | >18   | NR     | 52971                                  | NR     | Foundation  | China          | 0.57(0.02,1.12)     | 80.4%          | very low |
| <a href="#">26339067</a> | Wang, 2016      | coffee exposure                                      | each cup/d increment                  | 3(PubMed database, Web of Science China National Knowledge Infrastructure (CNKI) and WANFANG DATA"                                                                                                    | up to 1 May 2015     | 2  | Cohort | 1 EU; 1 USA                                | general adults           | >18   | NR     | 52971                                  | NR     | Foundation  | China          | 0.92(0.87,0.97)     | not applicable | very low |
| <a href="#">26518745</a> | Grosso, 2016(2) | coffee exposure                                      | highest intake vs lowest intake       | 2(PubMed Embase)                                                                                                                                                                                      | up to June 2015      | 3  | Cohort | 2 USA; 1 EU                                | general adults           | NR    | NR     | 316894(4656 cases)                     |        | NR          | Italy          | 0.74(0.5,0.99)      | 81.6%          | low      |

|                          |                 |                             |                                       |                                                                                                                                                                   |                       |    |        |                                            |                                |         |       |                    |                |             |                |                     |                |          |
|--------------------------|-----------------|-----------------------------|---------------------------------------|-------------------------------------------------------------------------------------------------------------------------------------------------------------------|-----------------------|----|--------|--------------------------------------------|--------------------------------|---------|-------|--------------------|----------------|-------------|----------------|---------------------|----------------|----------|
| <a href="#">26518745</a> | Grosso, 2016(2) | coffee exposure             | 500ml/d increment                     | 2(PubMed Embase                                                                                                                                                   | up to June 2015       | 3  | Cohort | 2 USA; 1 EU                                | general adults                 | NR      | NR    | 316894(4656 cases) |                | NR          | Italy          | 0.92(0.87,0.97)     | 32.9%          | low      |
| <a href="#">30726966</a> | Shafiei, 2019   | Mediterranean diet          | highest adherence vs lowest adherence | 5(PubMed/MEDLINE, ISI Web of Science, Scopus, Embase, and Google Scholar"                                                                                         | to May 2018           | 4  | Cohort | 2 EU; 1 Australia; 1 USA                   | general adults                 | 49.5-69 | NR    | 31742              | 8-12.6         | Institution | Iran           | 0.93(0.76,1.11)     | 43.3%          | low      |
| <a href="#">29540267</a> | Bae, 2018       | n-3 fatty acid intervention | n-3 vs placebo                        | 5(Ovid-MEDLINE ; EMBASE ; Web of Science ; Cochrane Library ; and Korean databases                                                                                | to September 2016     | 6  | RCTs   | 4 EU; 1 Asian; 1 Australia                 | depressed adult patients older | 65-80   | NR    | 4605               |                | NR          | South Korea    | -0.51(-0.98,-0.04)  | 84.1%          | low      |
| <a href="#">27113121</a> | Sarris, 2016    | n-3 fatty acid intervention | n-3 vs placebo or EPA vs DHA          | 4(PubMed, CINAHL, Web of Science, and Cochrane Library                                                                                                            | up to December 2015   | 11 | RCTs   | NR                                         | depressed adult patients       | >18     | NR    | 448                |                | NR          | Australia      | 0.61(0.15,1.06)     | 82.0%          | very low |
| <a href="#">27807012</a> | Li BR, 2017     | dietary magnesium exposure  | highest intake vs lowest intake       | 8(MEDLINE, Web of Science, Embase, Cochrane CENTRAL, Cumulative Index to Nursing and Allied Health Literature (CINAHL) database, CNKI, Wan fang databases and VIP | to September 2016,    | 2  | Cohort | EU                                         | general adults                 | 37-62   | NR    | 15259              | 6.3-20         | None        | China          | 0.84(0.44,1.23)     | 39.1%          | very low |
| <a href="#">27807012</a> | Li BR, 2017     | dietary magnesium exposure  | 361mg/day                             | 8(MEDLINE, Web of Science, Embase, Cochrane CENTRAL, Cumulative Index to Nursing and Allied Health Literature (CINAHL) database, CNKI, Wan fang databases and VIP | to September 2016,    | 2  | Cohort | EU                                         | general adults                 | 37-62   | NR    | 15259              | 6.3-21         | None        | China          | 0.87(0.78,0.98)     | Not applicable | very low |
| <a href="#">32829928</a> | Yosae, 2020     | dietary zinc exposure       | highest intake vs lowest intake       | 4 (PubMed, EMBASE, Scopus, and ISI web of science)                                                                                                                | up to 14 May 2020     | 4  | cohort | 3 Australia; 1 Finland                     | general adults                 | >54.7   | NR    | 15852(2243 cases)  | 3-20           | Institution | Iran           | 0.66(0.50,0.82)     | 13.9%          | high     |
| <a href="#">28189077</a> | Li ZY, 2017     | dietary zinc exposure       | highest intake vs lowest intake       | 5(PubMed, Embase, Web of Science, Chinese National Knowledge Infrastructure (CNKI) and Wanfang databases                                                          | up to January 2017    | 3  | Cohort | 2 Australia; 1 EU                          | general adults                 | 42-85   | 0-100 | 14147(2160 cases)  |                | None        | China          | 0.72(0.58,0.87)     | 0.0%           | very low |
| <a href="#">26978738</a> | Mocking, 2016   | n-3 fatty acid intervention | n-3 vs placebo                        | 2(Medline and Embase databases                                                                                                                                    | to 8 December 2015    | 13 | RCTs   | NR                                         | depressed adult patients       | 35-60   | NR    | 1233               |                | institution | Netherlands    | 0.398(0.114, 0.682) | 73.4%          | very low |
| <a href="#">30254236</a> | Lassale, 2019   | Mediterranean diet          | highest adherence vs lowest adherence | 3(Medline, Embase and PsychINFO                                                                                                                                   | to 31st May 2018      | 4  | Cohort | 2 EU; 2 Australia                          | general adults                 | 37-69   | NR    | 36556(1954 cases)  | 8.5-12.6       | Fundation   | United Kingdom | 0.64(0.5,0.78)      | 33.1%          | moderate |
| <a href="#">29031185</a> | Molendijk, 2018 | Mediterranean diet          | highest adherence vs lowest adherence | 3(Embase, PUBMED, and Web of Science                                                                                                                              | up to March 6th, 2017 | 5  | Cohort | 2 EU; 2 Australia; 1 USA                   | general adults                 | 30-71   | 0-42  | 38,366             | 6.5 month-12.6 | NR          | Netherlands    | 0.75 (0.67,0.84)    | 66.0%          | moderate |
| <a href="#">29031185</a> | Molendijk, 2018 | unhealthy dietary pattern   | highest adherence vs lowest adherence | 3(Embase, PUBMED, and Web of Science                                                                                                                              | up to March 6th, 2017 | 9  | Cohort | 4 EU; 2 USA; 1 Asia; 1 Australia; 1 Canada | general adults                 | 20-74   | 0-73  | 84870              | 6.5 month-12   | NR          | Netherlands    | 1.05 (0.99,1.12)    | 45.2%          | moderate |

|                          |                 |                             |                                       |                                                                                                                                           |                       |    |        |                                            |                          |        |        |                   |              |             |               |                    |                |          |
|--------------------------|-----------------|-----------------------------|---------------------------------------|-------------------------------------------------------------------------------------------------------------------------------------------|-----------------------|----|--------|--------------------------------------------|--------------------------|--------|--------|-------------------|--------------|-------------|---------------|--------------------|----------------|----------|
| <a href="#">32885996</a> | Askari, 2020    | vegetarian diet             | highest adherence vs lowest adherence | 3(Scopus, PubMed, and Web of Science                                                                                                      | to July 2020          | 3  | Cohort | 2 EU;1 Asia                                | general adults           | NR     | 0-100  | 19783             | 4-7          | Institution | Iran          | 1.02(0.94,1.1)     | 74.3%          | low      |
| <a href="#">30238628</a> | Yang MS,2018    | fish exposure               | highest intake vs lowest intake       | 2(PubMed and Web of Science                                                                                                               | up to April 2018      | 8  | Cohort | 3 USA; 2 Australia; 2 Asian; 1 EU          | general adults           | 25-82  | 0-100  | 101443(5732 cases | 5-25         | Fundation   | South Korea   | 0.86(0.76,0.95)    | 0.0%           | low      |
| <a href="#">30238628</a> | Yang MS,2018    | fish exposure               | 1 serving/week increment              | 2(PubMed and Web of Science                                                                                                               | up to April 2018      | 3  | Cohort | 1 EU; 1 Australia; 1 Asian                 | general adults           | 45-82  | 0-100  | 35431(1136 cases  | 5-25         | Fundation   | South Korea   | 0.89(0.75,1.04)    | 54.8%          | low      |
| <a href="#">29031185</a> | Molendijk,2018  | fish exposure               | highest intake vs lowest intake       | 3(Embase,PUBMED, and Web of Science                                                                                                       | up to March 6th, 2017 | 6  | Cohort | 3 EU; 2 USA; 1 Australia                   | general adults           | 25-74  | 38-100 | 69469             | 3-31         | NR          | Netherlands   | 0.86(0.788,0.96)   | 68.4%          | moderate |
| <a href="#">26936905</a> | Appleton,2016   | n-3 fatty acid intervention | n-3 vs placebo                        | 3(the Cochrane Depression, Anxiety and Neurosis Review Group's Specialised Register (CCDANCTR), CINAHL and International Trials Registers | to May 2015           | 25 | RCTs   | 6 EU; 7 USA; 5 Asia; 2 Canada; 2 Brazil;   | depressed adult patients | 29-84  | 0-66   | 1438              |              | Institution | United Kindom | -0.32(-0.52,-0.12) | 58.0%          | high     |
| <a href="#">24805797</a> | Grosso, 2014    | n-3 fatty acid intervention | n-3 vs placebo                        | 4(MEDLINE, EMBASE, PsycInfo, and the Cochrane Database systematic Reviews"                                                                | up to August 2013     | 19 | RCTs   | NR                                         | depressed adult patients | NR     | NR     | 1246              |              | institution | Italy         | 0.56(0.2,0.92)     | 71.0%          | low      |
| <a href="#">26359502</a> | Li,2016         | fish exposure               | highest intake vs lowest intake       | 3(PubMed, EMBASE and Web of Science                                                                                                       | up to March 2015      | 8  | Cohort | 2 EU; 3 USA; 1 Asia; 2 Australia;          | general adults           | 18-101 | 0-100  | 83087(6175 cases  |              | None        | China         | 0.80(0.72,0.88)    | 0.0%           | low      |
| <a href="#">27544316</a> | Grosso, 2016(1) | fish exposure               | highest intake vs lowest intake       | 4(MEDLINE,EMBASE, PsycInfo, Cochranen Database of Systematic Reviews                                                                      | up to August 2014     | 7  | Cohort | 4 EU; 3 USA                                | general adults           | 24-77  | NR     | 111681            | 4.4-10.6     | None        | Italy         | 0.78(0.64,0.93)    | 53.2%          | low      |
| <a href="#">21931319</a> | Bloch,2012      | n-3 fatty acid intervention | n-3 vs placebo                        | 1(PUMMED)                                                                                                                                 | up to MAY 2010        | 13 | RCTs   | NR                                         | depressed adult patients | NR     | NR     | 731               |              | institution | USA           | 0.11(-0.04,0.26)   | 73.0%          | low      |
| <a href="#">29031185</a> | Molendijk,2018  | Western dietary pattern     | highest adherence vs lowest adherence | 3(Embase,PUBMED, and Web of Science                                                                                                       | up to March 6th, 2017 | 6  | Cohort | 2 EU; 2 Australia; 1 USA; 1 Canada         | general adults           | 20-64  | 0-50   | 69424             | 6.5 month-13 | NR          | Netherlands   | 1.06 (0.94,1.19)   | 18.8%          | moderate |
| <a href="#">27544316</a> | Grosso, 2016(1) | fish exposure               | 50g/d                                 | 4(MEDLINE,EMBASE, PsycInfo, Cochranen Database of Systematic Reviews                                                                      | up to August 2014     | 2  | Cohort | EU                                         | general adults           | 50-90  | NR     | 12402             | 4.4-10.6     | None        | Italy         | 0.84(0.72,0.99)    | Not applicable | low      |
| <a href="#">29759102</a> | Saghafian,2018  | fruit exposure              | highest intake vs lowest intake       | 5(Pubmed, ISI (Web of Science), SCOPUS, Embase and Google Scholar"                                                                        | until Oct 2017        | 6  | Cohort | 1 Asia; 2 EU; 2 Australia; 1 USA           | general adults           | 21-85  | NR     | 99224(3726 cases) | NR           | institution | Iran          | 0.83(0.69,0.98)    | 84.5%          | low      |
| <a href="#">29759102</a> | Saghafian,2018  | fruit exposure              | per 100g increase intake              | 5(Pubmed, ISI (Web of Science), SCOPUS, Embase and Google Scholar                                                                         | until Oct 2017        | 3  | Cohort | 1 Asian;1 Columbia;1 Australia             | general adults           | 50-79  | NR     | 78855(2593 cases  | NR           | institution | Iran          | 0.97(0.95,0.99)    | NR             | low      |
| <a href="#">26691768</a> | Liu,2016        | fruit exposure              | highest intake vs lowest intake       | 3(PubMed, Embase, and Web of Knowledge                                                                                                    | up to June 2015       | 4  | Cohort | 1 Asia; 1 EU; 1 Australia; 1 North America | general adults           | 37-79  | NR     | 88949             | NR           | NR          | China         | 0.8(0.69,0.91)     | 52.6%          | very low |

|                          |                 |                                                            |                                 |                                                                                                                        |                   |    |        |                          |                          |         |        |                     |        |             |               |                     |                |          |
|--------------------------|-----------------|------------------------------------------------------------|---------------------------------|------------------------------------------------------------------------------------------------------------------------|-------------------|----|--------|--------------------------|--------------------------|---------|--------|---------------------|--------|-------------|---------------|---------------------|----------------|----------|
| <a href="#">29282023</a> | Zhang,2017      | meat consumption                                           | highest intake vs lowest intake | 2(PUBMED and EMBASE)                                                                                                   | up to March 2017  | 3  | Cohort | 1 Asia; 1 EU;1 Australia | general adults           | 37.2-80 | 0-57.6 | 20072               | NR     | foundation  | China         | 1.13(1.03,1.24)     | 19.4%          | very low |
| <a href="#">30238628</a> | Yang MS,2018    | n-3 fatty acid exposure                                    | highest intake vs lowest intake | 2(PubMed and Web of Science)                                                                                           | up to April 2018  | 5  | Cohort | 2 USA; 2 EU; 1 Asian     | general adults           | 24-82   | 0-100  | 41952(1544 cases)   | 7.5-25 | Fundation   | South Korea   | 0.87(0.74,1.04)     | 11.0%          | low      |
| <a href="#">21939614</a> | Sublette,2011   | n-3 fatty acid intervention                                | n-3 vs placebo                  | 1(PUMMED)                                                                                                              | up to June 2010   | 15 | RCTs   | NR                       | depressed adult patients | 30-65   | NR     | 916                 |        | Fundation   | USA           | 0.55(0.277,0.838)   | NR             | very low |
| <a href="#">31004628</a> | Liu,2019        | prebiotic intervention                                     | prebiotic vs placebo            | 3(Embase, MEDLINE, and PsycINFO)                                                                                       | NR                | 5  | RCTs   | NR                       | depressed adult patients | 23-54   | 49-51  | 384                 |        | None        | USA           | -0.08(-0.3,0.15)    | NR             | very low |
| <a href="#">31263542</a> | Nikolova, 2019  | probiotic strains intervention                             | probiotic vs placebo            | 3(PubMed and ISI Google Scholar, Web of Science)                                                                       | on 11 May 2018    | 3  | RCTs   | 2 Iran; 1Ireland         | depressed adult patients | 18-55   | 24%    | 229                 |        | Institution | United Kindom | 0.826(-0.527,2.178) | 94.7%          | very low |
| <a href="#">30238628</a> | Yang MS,2018    | n-3 fatty acid exposure                                    | 500mg/d increment               | 2(PubMed and Web of Science)                                                                                           | up to April 2018  | 4  | Cohort | 2 USA;1 EU; 1 Asian      | general adults           | 35-82   | 0-41.6 | 64134(3377 cases)   | 7.5-25 | Fundation   | South Korea   | 0.99(0.94,1.04)     | 0.0%           | low      |
| <a href="#">27544316</a> | Grosso, 2016(1) | n-3 fatty acid exposure                                    | highest intake vs lowest intake | 4(MEDLINE,EMBASE, PsycInfo, Cochranen Database of Systematic Reviews)                                                  | up to August 2014 | 4  | Cohort | 3 EU;1 USA               | general adults           | 24-69   | NR     | 41588               | 2-13   | None        | Italy         | 0.84(0.71,0.97)     | 15.4%          | low      |
| <a href="#">27544316</a> | Grosso, 2016(1) | n-3 fatty acid exposure                                    | 1.8g/d                          | 4(MEDLINE,EMBASE, PsycInfo, Cochranen Database of Systematic Reviews)                                                  | up to August 2014 | 2  | Cohort | 2 Australia              | general adults           | 25-64   | NR     | 13757               | 3-10   | None        | Italy         | 0.3(0.09,0.98)      | Not applicable | low      |
| <a href="#">31004628</a> | Liu,2019        | probiotic strains intervention                             | probiotic vs placebo            | 3(Embase, MEDLINE, and PsycINFO)                                                                                       | NR                | 23 | RCTs   | NR                       | healthy adults           | 0-100   | 18-79  | 2574                |        | None        | USA           | -0.24(-0.36,-0.12)  | 48.2%          | very low |
| <a href="#">31647041</a> | Deane,2019      | PUFA intervention                                          | higher intake vs lower intake   | 5(Cochrane Central, Medline and EMBASE,Clinicaltrials.com and the WHO International Clinical Trials Registry Platform) | to 27 April,2017  | 13 | RCTs   | 7 UK; 5 USA; 1 Japan     | general adults           | 50-85   | NR     | 26528(1355 cases)   |        | Fundation   | United Kindom | 1.01(0.92,1.1)      | 0.0%           | moderate |
| <a href="#">32937855</a> | Nucci,2020      | red and processed meat intake                              | highest intake vs lowest intake | 4(PubMed/Medline, Excerpta Medica dataBASE (EMBASE) and Scopus)                                                        | up to March 2020  | 5  | cohort | 1 Asia;3 EU;1 Australia  | general adults           | 39-81   | NR     | 21486(2352 cases)   | 3-9    | None        | Italy         | 1.15(1.0,1.3)       | 48.3%          | very low |
| <a href="#">30419536</a> | Hu,2019         | Sugar-sweetened beverages (SSBs) or sweet food consumption | highest intake vs lowest intake | 2("PubMed and Web of Science")                                                                                         | up to June 2018   | 4  | Cohort | 2 EU; 2 Australia        | general adults           | 35-71   | NR     | 277405(12630 cases) | NR     | None        | China         | 1.3(1.19,1.41)      | 0.0%           | low      |
| <a href="#">30419536</a> | Hu,2019         | Sugar-sweetened beverages (SSBs) or sweet food consumption | per 2 cup/d of cola             | 2("PubMed and Web of Science")                                                                                         | up to June 2018   | 4  | Cohort | 2 EU; 2 Australia        | general adults           | 35-71   | NR     | 277405(12630 cases) | NR     | None        | China         | 1.05(1.01,1.09)     | Not applicable | low      |
| <a href="#">29500461</a> | Kang,2018       | tea exposure                                               | highest intake vs lowest intake | 2(PubMed and Web of Science)                                                                                           | to February 2017  | 5  | cohort | 3 Asia; 1 EU; 1USA       | general adults           | 42-93   | 0-100  | 259818(11937 cases) | NR     | Government  | South Korea.  | 0.82(0.48,1.16)     | 68.7%          | very low |
| <a href="#">26518745</a> | Grosso, 2016(2) | tea exposure                                               | highest intake vs lowest intake | 2(PubMed Embase)                                                                                                       | up to June 2015   | 2  | Cohort | 1 Asia; 1 USA            | general adults           | NR      | NR     | 265538(2073 cases)  |        | NR          | Italy         | 1.02(0.73,1.43)     | 70.0%          | low      |

|                          |                 |                                            |                                       |                                                                                                                                                                                |                      |    |                            |                                            |                                            |       |        |                                     |      |             |           |                       |       |          |
|--------------------------|-----------------|--------------------------------------------|---------------------------------------|--------------------------------------------------------------------------------------------------------------------------------------------------------------------------------|----------------------|----|----------------------------|--------------------------------------------|--------------------------------------------|-------|--------|-------------------------------------|------|-------------|-----------|-----------------------|-------|----------|
| <a href="#">26518745</a> | Grosso, 2016(2) | tea exposure                               | 100ml/d increment                     | 2(PubMed Embase                                                                                                                                                                | up to June 2015      | 2  | Cohort                     | 1Asia; 1 USA                               | general adults                             | NR    | NR     | 265538(2073 cases                   |      | NR          | Italy     | 0.89(0.64,1.15)       | 88.7% | low      |
| <a href="#">25657295</a> | Dong,2015       | tea exposure                               | highest intake vs lowest intake       | 3(Embase, PubMed, and Chinese National Knowledge Infrastructur                                                                                                                 | through August 2014  | 5  | Cohort                     | 4 Asia;1 EU                                | general adult population                   | 42-65 | NR     | 9000(1166 cases                     | NR   | None        | China     | 0.81(0.66,0.95)       | 13.3% | low      |
| <a href="#">25657295</a> | Dong,2015       | tea exposure                               | 3 cup/d increment                     | 3(Embase, PubMed, and Chinese National Knowledge Infrastructur                                                                                                                 | through August 2014  | 8  | 3 cohort 5 cross-sectional | 7 Asia;1 EU                                | general adult population                   | 20-76 | NR     | 10600(2107 cases                    |      | None        | China     | 0.63(0.55,0.71)       | 0.0%  | low      |
| <a href="#">29759102</a> | Saghafian,2018  | vegetable exposure                         | highest intake vs lowest intake       | 5(Pubmed, ISI (Web of Science), SCOPUS, Embase and Google Scholar"                                                                                                             | until Oct 2017       | 7  | Cohort                     | 2 Asia; 2 EU; 2 Australia; 1 USA           | general adults                             | 21-85 | NR     | 100295(4065 cases)                  | NR   | institution | Iran      | 0.85(0.73,0.97)       | 68.1% | low      |
| <a href="#">31563280</a> | Goh,2019        | probiotic strains intervention             | probiotic vs placebo                  | 7(PubMed, Embase, Medline, Cochrane, Web of Science, and ProQuest ; ClinicalTrials.gov/International Clinical Trials Registry Platform                                         | to August 25, 2018.  | 19 | RCTs                       | 10 Asia; 7 EU; 2 New zealand)              | general adults                             | 20-85 | 0-100  | 1901(intervention 1030; control 871 |      | Institution | China     | -0.31(-0.56,-0.07)    | 86.0% | high     |
| <a href="#">29197739</a> | Qin,2018        | probiotic strains intervention             | probiotic vs placebo                  | 5(PubMed, Ovid, Clinical Trials Register of the Cochrane Collaboration Depression, Anxiety and Neurosis Group (CCDANTR) and Cochrane Field for Complementary Medicine database | to 1-June-2017       | 10 | RCTs                       | 5 Asia; 3 EU;1 Canada; 1 New zealand       | depressed adult patients or healthy adults | 18-76 | NR     | 1178                                |      | NR          | Singapore | -0.128(-0.261,0.00463 | 0.8%  | low      |
| <a href="#">29759102</a> | Saghafian,2018  | vegetable exposure                         | per 100g increace intake              | 5(Pubmed, ISI (Web of Science), SCOPUS, Embase and Google Scholar"                                                                                                             | until Oct 2017       | 4  | Cohort                     | 2 Asia;1 USA ;1 Australia                  | general adults                             | 50-80 | NR     | 79926(2932 cases                    | NR   | institution | Iran      | 0.97(0.95,0.98)       | NR    | low      |
| <a href="#">26691768</a> | Liu,2016        | vegetable exposure                         | highest intake vs lowest intake       | 3(PubMed, Embase, and Web of Knowledge                                                                                                                                         | up to June 2015      | 4  | Cohort                     | 1 Asia; 1 EU; 1 Australia; 1 North America | general adults                             | 37-79 | NR     | 87795                               | NR   | NR          | China     | 0.87(0.79,0.96)       | 0.0%  | very low |
| <a href="#">27509521</a> | Huang, 2016     | probiotic strains intervention             | probiotic vs placeco                  | 7(PubMed, Medline, Springer,Elsevier Science, EMBASE, Cochrane Library, China Knowledge Resource Integrated (CNKI                                                              | to 1 January 2016    | 5  | RCTs                       | 3 Asia; 2 EU                               | healthy and depressed patients             | 20-65 | NR     | 365(intervention 183; control 182   |      | institution | China     | -0.3(-0.51,-0.09)     | 0.0%  | low      |
| <a href="#">30470803</a> | Elin,2019       | very low calorie diet                      | very low calorie vs control           | 3(PsycINFO, MEDLINE, and Scopus,                                                                                                                                               | to November 10, 2017 | 11 | RCTs                       | NR                                         | depressed adult patients                   | 20-58 | 0-53   | 354                                 |      | NR          | Canada    | -0.728(-1.204,-0.253) | NR    | very low |
| <a href="#">24196402</a> | Lai,2014        | Western dietary pattern                    | highest adherence vs lowest adherence | 5(Medline, Embase, and PsycInfo via Ovid,EBSCO,Proquest                                                                                                                        | up to August 2013    | 2  | Cohort                     | 1 EU; 1 USA                                | general adult population                   | 35-62 | 0-73.8 | 54091                               | 5-12 | None        | Australia | 1.25(0.8,1.7)         | 64.1% | low      |
| <a href="#">28431261</a> | Li Y,2017       | western/unhealthy dietary pattern exposure | highest adherence vs lowest adherence | 2(MEDLINE and EMBASE databases                                                                                                                                                 | up to September 2016 | 8  | Cohort                     | 2 Asia; 3 EU; 1 Australia; 1 Canada; 1 USA | general adults                             | 20-77 | NR     | 75481                               | NR   | Government  | China     | 1.16(1.01,1.34)       | 71.0% | low      |

|                          |                    |                        |                      |                                                                                                                                                                   |                                 |   |      |                                  |                          |       |      |                                       |  |           |           |                   |       |      |
|--------------------------|--------------------|------------------------|----------------------|-------------------------------------------------------------------------------------------------------------------------------------------------------------------|---------------------------------|---|------|----------------------------------|--------------------------|-------|------|---------------------------------------|--|-----------|-----------|-------------------|-------|------|
| <a href="#">25701329</a> | Gowda M.H.N., 2015 | vitamin D intervention | vitamin D vs placebo | 5(MEDLINE, EMBASE, psych INFO, CINAHL plus, and Cochrane library)                                                                                                 | to May 2014                     | 9 | RCTs | 2 EU; 3 USA; 3 Australia; 1 Asia | general adult population | 22-72 | NR   | 4923                                  |  | Fundation | Australia | 0.28(-0.14,0.69)  | 85.0% | low  |
| <a href="#">24632894</a> | Shaffer, 2014      | vitamin D intervention | vitamin D vs placebo | 6(Ovid MEDLINE, The Cochrane Library, Cumulative Index to Nursing and Allied Health Literature, Allied and Complimentary Medicine Database, PsycINFO, and Scopus) | to the second week of May, 2013 | 7 | RCTs | 2 USA; 2 EU; 2 Asia; 1 Australia | depressed adult patients | 18-70 | 0-46 | 3191( intervention 1640 control 1551) |  | Fundation | USA       | -0.14(-0.33,0.05) | 70.3% | low  |
| <a href="#">24423304</a> | Li, 2014           | vitamin D intervention | vitamin D vs placebo | 6(Ovid MEDLINE, The Cochrane Library, Cumulative Index to Nursing and Allied Health Literature, Allied and Complimentary Medicine Database, PsycINFO, and Scopus) | up to April 2013                | 6 | RCTs | 2 USA; 2 EU; 1 Asia; 1 Australia | depressed adult patients | 18-70 | 0-46 | 1203                                  |  | None      | China     | -0.14(-0.41,0.13) | 77.0% | high |
