# Supplementary material for: Role of dietary factors in the prevention and treatment for depression: an umbrella review of meta-analyses of prospective studies
Source: PubMed Central journal article supplement (PMC8445939; doi:10.1038/s41398-021-01590-6), 2021-09-16
Supplement: 41398_2021_1590_MOESM3_ESM.pdf [file 41398_2021_1590_MOESM3_ESM.pdf]

**Supplementary Table 3. The detail scores of AMSTAR-2 for meta-analyses included in the umbrella review.**

| Author (year)   | Critical domains                        |                                          |                                           |                                             |                                                            |                            |                                                  | non-critical domains |                                    |                              |                              |                                     |                                          |                                              |                                             |                                | Level    |
|-----------------|-----------------------------------------|------------------------------------------|-------------------------------------------|---------------------------------------------|------------------------------------------------------------|----------------------------|--------------------------------------------------|----------------------|------------------------------------|------------------------------|------------------------------|-------------------------------------|------------------------------------------|----------------------------------------------|---------------------------------------------|--------------------------------|----------|
|                 | Established methods prior to conduction | Comprehensive literature search strategy | List of excluded studies and justify them | Suitable technique for risk bias assessment | Appropriate methods for statistical combination of results | Discussion on risk of bias | Investigation of publication bias and discussion | PICO components      | Study design selection explanation | Study selection in duplicate | Data extraction in duplicate | Describe included studies in detail | Report on the funding of primary studies | Assessment on the risk of bias for synthesis | explanation or discussion for heterogeneity | Report on conflict of interest |          |
| Pagliai,2021    | YES                                     | YES                                      | YES                                       | YES                                         | YES                                                        | YES                        | YES                                              | YES                  | YES                                | YES                          | YES                          | YES                                 | NO                                       | YES                                          | YES                                         | YES                            | high     |
| Tome,2021       | PARTLY YES                              | YES                                      | YES                                       | YES                                         | YES                                                        | YES                        | YES                                              | YES                  | YES                                | YES                          | YES                          | YES                                 | NO                                       | YES                                          | YES                                         | YES                            | low      |
| Fusar-Poli,2021 | YES                                     | YES                                      | YES                                       | YES                                         | YES                                                        | YES                        | YES                                              | YES                  | YES                                | YES                          | YES                          | YES                                 | NO                                       | YES                                          | YES                                         | YES                            | high     |
| Yosae, 2020     | YES                                     | YES                                      | YES                                       | YES                                         | YES                                                        | YES                        | YES                                              | YES                  | YES                                | YES                          | YES                          | YES                                 | NO                                       | YES                                          | YES                                         | YES                            | high     |
| Nucci,2020      | NO                                      | YES                                      | YES                                       | YES                                         | YES                                                        | YES                        | YES                                              | YES                  | YES                                | YES                          | YES                          | YES                                 | NO                                       | YES                                          | YES                                         | YES                            | low      |
| Li,2020         | PARTLY YES                              | YES                                      | YES                                       | YES                                         | YES                                                        | YES                        | YES                                              | YES                  | YES                                | YES                          | NO                           | YES                                 | NO                                       | YES                                          | YES                                         | YES                            | low      |
| Askari,2020     | NO                                      | YES                                      | YES                                       | YES                                         | YES                                                        | YES                        | YES                                              | YES                  | YES                                | NO                           | YES                          | YES                                 | NO                                       | YES                                          | YES                                         | YES                            | low      |
| Young,2019      | NO                                      | YES                                      | YES                                       | NO                                          | YES                                                        | NO                         | NO                                               | YES                  | YES                                | YES                          | YES                          | YES                                 | NO                                       | NO                                           | YES                                         | YES                            | very low |
| Tolkien,2019    | PARTLY YES                              | PARTLY YES                               | YES                                       | YES                                         | YES                                                        | YES                        | YES                                              | YES                  | YES                                | YES                          | NO                           | YES                                 | NO                                       | YES                                          | YES                                         | YES                            | very low |
| Shafiei,2019    | NO                                      | YES                                      | YES                                       | YES                                         | YES                                                        | YES                        | YES                                              | YES                  | YES                                | YES                          | YES                          | YES                                 | NO                                       | YES                                          | YES                                         | YES                            | low      |
| Liu,2019        | NO                                      | YES                                      | YES                                       | YES                                         | YES                                                        | YES                        | YES                                              | YES                  | YES                                | NO                           | NO                           | YES                                 | NO                                       | YES                                          | YES                                         | YES                            | low      |
| Liao,2019       | NO                                      | YES                                      | YES                                       | YES                                         | YES                                                        | YES                        | YES                                              | YES                  | YES                                | YES                          | YES                          | YES                                 | NO                                       | YES                                          | YES                                         | YES                            | low      |
| Lassale,2019    | YES                                     | YES                                      | YES                                       | YES                                         | YES                                                        | YES                        | YES                                              | YES                  | YES                                | NO                           | NO                           | YES                                 | NO                                       | YES                                          | YES                                         | YES                            | Moderate |
| Hu,2019         | NO                                      | YES                                      | YES                                       | YES                                         | YES                                                        | YES                        | YES                                              | YES                  | YES                                | YES                          | YES                          | YES                                 | NO                                       | YES                                          | YES                                         | YES                            | low      |
| Firth,2019      | YES                                     | YES                                      | YES                                       | YES                                         | YES                                                        | YES                        | YES                                              | YES                  | YES                                | YES                          | YES                          | YES                                 | NO                                       | YES                                          | YES                                         | YES                            | high     |
| Elin,2019       | NO                                      | PARTLY YES                               | YES                                       | NO                                          | YES                                                        | NO                         | YES                                              | YES                  | YES                                | YES                          | YES                          | YES                                 | NO                                       | NO                                           | YES                                         | YES                            | very low |
| Deane,2019      | YES                                     | YES                                      | YES                                       | YES                                         | YES                                                        | YES                        | YES                                              | YES                  | YES                                | YES                          | YES                          | YES                                 | NO                                       | YES                                          | YES                                         | YES                            | high     |
| Yang MS,2018    | NO                                      | YES                                      | YES                                       | YES                                         | YES                                                        | YES                        | YES                                              | YES                  | YES                                | NO                           | YES                          | YES                                 | NO                                       | YES                                          | YES                                         | YES                            | low      |
| Veronese,2018   | NO                                      | YES                                      | YES                                       | YES                                         | YES                                                        | YES                        | YES                                              | YES                  | YES                                | NO                           | YES                          | YES                                 | NO                                       | YES                                          | YES                                         | YES                            | low      |
| Saghafian,2018  | NO                                      | YES                                      | YES                                       | YES                                         | YES                                                        | YES                        | YES                                              | YES                  | YES                                | YES                          | NO                           | YES                                 | NO                                       | YES                                          | YES                                         | YES                            | low      |
| Molendijk,2018  | YES                                     | YES                                      | YES                                       | YES                                         | YES                                                        | YES                        | YES                                              | YES                  | YES                                | NO                           | NO                           | YES                                 | NO                                       | YES                                          | YES                                         | YES                            | moderate |
| Kang,2018       | NO                                      | YES                                      | YES                                       | NO                                          | YES                                                        | NO                         | YES                                              | YES                  | YES                                | NO                           | YES                          | YES                                 | NO                                       | YES                                          | YES                                         | YES                            | very low |
| Li Y,2017       | NO                                      | YES                                      | YES                                       | YES                                         | YES                                                        | YES                        | YES                                              | YES                  | YES                                | YES                          | NO                           | YES                                 | NO                                       | NO                                           | YES                                         | YES                            | low      |
| Li BR,2017      | NO                                      | YES                                      | YES                                       | NO                                          | YES                                                        | NO                         | YES                                              | YES                  | YES                                | YES                          | NO                           | YES                                 | NO                                       | YES                                          | YES                                         | YES                            | very low |
| Wang,2016       | NO                                      | YES                                      | YES                                       | NO                                          | YES                                                        | NO                         | YES                                              | YES                  | YES                                | YES                          | NO                           | NO                                  | NO                                       | YES                                          | YES                                         | YES                            | very low |
| Sarris,2016     | NO                                      | YES                                      | YES                                       | NO                                          | YES                                                        | NO                         | YES                                              | YES                  | YES                                | NO                           | NO                           | YES                                 | NO                                       | YES                                          | YES                                         | YES                            | very low |
| Grosso,2016(1)  | NO                                      | YES                                      | YES                                       | YES                                         | YES                                                        | YES                        | YES                                              | YES                  | YES                                | YES                          | YES                          | YES                                 | NO                                       | YES                                          | YES                                         | YES                            | low      |
| Grosso,2016(2)  | NO                                      | YES                                      | YES                                       | YES                                         | YES                                                        | YES                        | YES                                              | YES                  | YES                                | YES                          | YES                          | YES                                 | NO                                       | YES                                          | YES                                         | YES                            | low      |
