# Supplementary material for: Role of dietary factors in the prevention and treatment for depression: an umbrella review of meta-analyses of prospective studies
Source: PubMed Central journal article supplement (PMC8445939; doi:10.1038/s41398-021-01590-6), 2021-09-16
Supplement: 41398_2021_1590_MOESM4_ESM.pdf [file 41398_2021_1590_MOESM4_ESM.pdf]

**Supplementary Table 4. The detail scores in the NutriGrade for included meta-analyses in this umbrella review.**

| PMID                     | Author (year)    | Dietary intervention/exposures                             | Comparion                                   | Risk of bias | Precision | Heterogeneity | Directness | Publication bias | Funding bias | Effect size | Dose-response | Overall scores | level    |
|--------------------------|------------------|------------------------------------------------------------|---------------------------------------------|--------------|-----------|---------------|------------|------------------|--------------|-------------|---------------|----------------|----------|
| <a href="#">32792031</a> | Pagliai,2021     | ultra-processed foods                                      | highest intake vs lowest intake             | 2            | 1         | 0             | 1          | 0                | 1            | 0           | 0             | 5              | low      |
| <a href="#">33970709</a> | Fusar-Poli, 2021 | cocoa-rich foods                                           | cocoa-rich products vs placebo              | 2            | 1         | 0             | 1          | 0                | 1            | 2           |               | 7              | moderate |
| <a href="#">33533015</a> | Tome, 2021       | vitamin D supplementation                                  | vitamin D vs placebo                        | 2            | 0         | 0.8           | 1          | 1                | 1            | 2           |               | 7.8            | moderate |
| <a href="#">32829928</a> | Yosae, 2020      | dietary zinc exposure                                      | highest intake vs lowest intake             | 2            | 1         | 0             | 1          | 0                | 1            | 1           | 0             | 6              | Moderate |
| <a href="#">32829928</a> | Yosae, 2020      | dietary zinc supplementation                               | zinc vs placebo/antidepressants             | 2            | 0         | 0.4           | 0          | 0.5              | 1            | 2           |               | 5.9            | low      |
| <a href="#">32937855</a> | Nucci,2020       | red and processed meat intake                              | highest intake vs lowest intake             | 2            | 1         | 0             | 1          | 0.5              | 0.5          | 0           | 0             | 5              | low      |
| <a href="#">31837230</a> | Li,2020          | drink intake                                               | heavy drinking vs non-heavy                 | 1            | 1         | 0.8           | 1          | 1                | 1            | 0           | 1             | 6.8            | moderate |
| <a href="#">32885996</a> | Askari,2020      | vegetarian diet                                            | highest adherence vs lowest adherence       | 2            | 0         | 0             | 1          | 0                | 1            | 0           | 0             | 4              | low      |
| <a href="#">31527485</a> | Young,2019       | B vitamin supplementation                                  | B vitamin vs placebo                        | 0            | 0         | 0.4           | 0          | 0.5              | 1            | 2           | 0             | 3.9            | very low |
| <a href="#">30502975</a> | Tolkien,2019     | inflammatory potential of the diet (DII or cvtokine)       | higherstaderence vs lowest adherence        | 1            | 1         | 0.4           | 1          | 0.5              | 0.5          | 1           | 0             | 5.4            | low      |
| <a href="#">30726966</a> | Shafiei,2019     | Mediterranean diet                                         | highest adherence vs lowest adherence       | 2            | 0         | 0             | 1          | 0                | 1            | 0           | 0             | 4              | low      |
| <a href="#">31004628</a> | Liu,2019         | prebiotic intervention                                     | prebiotic vs placebo                        | 1            | 0         | 0             | 0          | 0.5              | 1            | 2           |               | 4.5            | low      |
| <a href="#">31383846</a> | Liao,2019        | n-3 fatty acid intervention                                | n-3 fatty acid vs placebo                   | 1            | 1         | 0.8           | 0          | 1                | 1            | 2           |               | 6.8            | moderate |
| <a href="#">30254236</a> | Lassale,2019     | AHEI or AHEI-2010 scores                                   | highest adherence vs lowest adherence       | 2            | 1         | 0             | 1          | 0                | 1            | 1           | 0             | 6              | moderate |
| <a href="#">30419536</a> | Hu,2019          | Sugar-sweetened beverages (SSBs) or sweet food consumption | highest intake vs lowest intake             | 2            | 1         | 0             | 1          | 0                | 0.5          | 1           | 1             | 6.5            | moderate |
| <a href="#">31004628</a> | Liu,2019         | probiotic strains intervention                             | probiotic vs placebo                        | 1            | 1         | 0.8           | 0          | 1                | 1            | 2           |               | 6.8            | moderate |
| <a href="#">30720698</a> | Firth,2019       | dietary intervention                                       | dietary intervention vs non dietary control | 2            | 1         | 0.8           | 0          | 1                | 1            | 2           |               | 7.8            | moderate |
| <a href="#">30470803</a> | Elin,2019        | very low calorie diet                                      | very low calorie vs control                 | 0            | 1         | 0.4           | 0          | 1                | 0.5          | 2           |               | 4.9            | low      |

|                          |                |                                                 |                                       |   |   |     |   |     |     |   |   |     |          |
|--------------------------|----------------|-------------------------------------------------|---------------------------------------|---|---|-----|---|-----|-----|---|---|-----|----------|
| <a href="#">31647041</a> | Deane,2019     | PUFA intervention                               | higher intake vs lower intake         | 1 | 1 | 0.8 | 0 | 1   | 1   | 2 |   | 6.8 | moderate |
| <a href="#">30238628</a> | Yang MS,2018   | fish exposure                                   | higher intake vs lower intake         | 2 | 1 | 0.4 | 1 | 0.5 | 1   | 0 | 1 | 6.9 | moderate |
| <a href="#">29076953</a> | Veronese,2018  | Acetyl-L-Carnitine supplementation intervention | ALC vs placebo                        | 1 | 1 | 0.3 | 1 | 0.5 | 0.5 | 2 |   | 6.3 | moderate |
| <a href="#">29076953</a> | Veronese,2018  | Acetyl-L-Carnitine supplementation intervention | ALC vs antidepressant                 | 2 | 0 | 0   | 1 | 0   | 0.5 | 2 |   | 5.5 | low      |
| <a href="#">29759102</a> | Saghafian,2018 | fruit exposure                                  | highest intake vs lowest intake       | 1 | 1 | 0.4 | 1 | 0.5 | 1   | 0 | 1 | 5.9 | low      |
| <a href="#">29759102</a> | Saghafian,2018 | vegetable exposure                              | highest intake vs lowest intake       | 1 | 1 | 0.5 | 1 | 0.5 | 1   | 0 | 0 | 5   | low      |
| <a href="#">29031185</a> | Molendijk,2018 | healthy dietary pattern                         | highest adherence vs lowest adherence | 2 | 1 | 0.4 | 1 | 0.5 | 0.5 | 1 | 0 | 6.4 | moderate |
| <a href="#">29500461</a> | Kang,2018      | tea exposure                                    | highest intake vs lowest intake       | 0 | 1 | 0.3 | 1 | 0.5 | 1   | 0 | 0 | 3.8 | very low |
| <a href="#">28431261</a> | Li Y,2017      | western/unhealthy dietary pattern exposure      | highest adherence vs lowest adherence | 2 | 0 | 0.4 | 1 | 0.5 | 1   | 0 | 0 | 4.9 | low      |
| <a href="#">27807012</a> | Li BR,2017     | dietary magnesium exposure                      | highest intake vs lowest intake       | 0 | 1 | 0   | 1 | 0   | 0.5 | 0 | 1 | 3.5 | very low |
| <a href="#">26339067</a> | Wang,2016      | caffeine exposure                               | highest intake vs lowest intake       | 0 | 1 | 0   | 1 | 0   | 1   | 0 | 1 | 4   | low      |
| <a href="#">27113121</a> | Sarris,2016    | folic acid supplementation                      | folic acid vs placebo                 | 0 | 0 | 0   | 1 | 0   | 0.5 | 2 |   | 3.5 | very low |
| <a href="#">27544316</a> | Grosso,2016(1) | n-3 fatty acid exposure                         | highest intake vs lowest intake       | 2 | 1 | 0   | 1 | 0   | 0.5 | 0 | 1 | 5.5 | low      |
| <a href="#">26518745</a> | Grosso,2016(2) | coffee exposure                                 | highest intake vs lowest intake       | 2 | 1 | 0   | 1 | 0   | 0.5 | 1 | 1 | 6.5 | moderate |
